# Supplementary material
Source: publisher figshare collection journal article supplement (https://wiley.figshare.com/articles/dataset/_/4522901)
Supplement: Supplementary file 1 [file 1]

```
#####
## This document describes the function iivwGEE that implements the IIV-weighted estimation
and doubly weighted estimation methods for model (5.1), as well as the form of the input data.

## Date: 11/5/2016

## Corresponding Author: Yayuan Zhu, Ph.D.

## Department of Statistics and Actuarial Science

## University of Waterloo

## Waterloo, ON N2L 3G1, Canada.

## E-mail: yayuan.zhu@uwaterloo.ca

#####
```

## Data Example

| id | visit.time | A | Y | weight    |
|----|------------|---|---|-----------|
| 1  | 0.09       | 0 | 1 | 5.156184  |
| 1  | 0.26       | 0 | 1 | 19.133358 |
| 1  | 0.52       | 0 | 0 | 4.971385  |
| 1  | 1.62       | 0 | 0 | 3.549988  |
| 1  | 1.81       | 0 | 0 | 86.425947 |
| 1  | 2.20       | 0 | 0 | 13.880862 |
| 1  | 2.24       | 0 | 0 | 11.750408 |
| 1  | 2.65       | 0 | 0 | 4.237465  |
| 1  | 2.71       | 0 | 0 | 10.362656 |
| 1  | 3.14       | 0 | 0 | 36.369958 |
| 1  | 3.25       | 0 | 0 | 11.794009 |
| 1  | 3.35       | 0 | 0 | 36.222299 |
| 1  | 3.87       | 0 | 0 | 3.634260  |
| 1  | 3.91       | 0 | 0 | 32.251257 |
| 1  | 4.18       | 0 | 0 | 46.446658 |
| 1  | 4.23       | 0 | 0 | 66.262965 |
| 1  | 4.66       | 0 | 0 | 12.151974 |
| 1  | 4.98       | 0 | 0 | 26.410940 |

## Format

|              |                                                                                                                                                                                                                                                                                                            |
|--------------|------------------------------------------------------------------------------------------------------------------------------------------------------------------------------------------------------------------------------------------------------------------------------------------------------------|
| "id"         | subject id.                                                                                                                                                                                                                                                                                                |
| "visit.time" | times where people visit and responses Y (failed or alive) are observed; it is noted that visit times are irregularly-spaced.                                                                                                                                                                              |
| "A"          | time-fixed binary treatment variable: 1=active treatment and 0=inactive treatment.                                                                                                                                                                                                                         |
| "Y"          | response (survival indicator) defined as $I(T > \text{visit.time})$ , 0=failed, 1=alive.                                                                                                                                                                                                                   |
| "weight"     | to implement the IIV-weighted GEE method, weight = IIV weight; the dataset shown above is an example of Case A; in Case B, it is noted that the IIV weights after an observed failure are set as 1. To implement the doubly weighted estimation method, weight = the product of IIV weight and IPT weight. |

## Function "iivwGEE"

### Description

R function for implementing the IIV-weighted GEE and doubly weighted estimation methods for parameters estimation.

### Usage

```
iivwGEE(dataset, surv.fn, theta.init, grid)
```

### Arguments

|              |                                                                                                              |
|--------------|--------------------------------------------------------------------------------------------------------------|
| "dataset"    | data frame has the same format as the data example provided above, sorted by id and by visit.time within id. |
| "surv.fn"    | a parametric survival function with the parameter theta of interest for estimation.                          |
| "theta.init" | initial value of theta for numerically solving the estimating function by the Newton-Raphson Method.         |

“grid”                      grid used for discretizing time scale in our simulations, e.g. grid = 100 if a grid of 100 per unit is used. The grid is used to speed up computation by defining it so that each visit time is a point on the grid.

## Example

```
> library(nleqslv)

> surv.fn <- function(dataset, theta, grid){

+   theta0 <- theta[1]

+   theta1 <- theta[2]

+   surv <- (1-exp(theta0+theta1*dataset$A))^(grid*dataset$visit.time)

+   return(surv)

+ }

> theta.est <- iivwGEE(simu.data, surv.fn=surv.fn, theta.init=c(-1,-1), grid=100)

> print(theta.est)

[1] -3.645703 -2.101242
```
